# Supplementary material
Source: Elsevier journal article supplement (https://www.sciencedirect.com/science/article/pii/S2173574322001241)
Supplement: mmc2 [file S2173574322001241:mmc2.pdf]

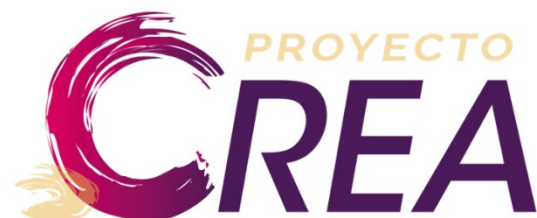

**PROYECTO CREA:**

*Evaluación de la situación actual y  
estrategias de mejora en el  
abordaje integral del paciente con  
EspA axial y Artritis Psoriásica.*

**Cuestionario DELPHI**

## 1. ÍNDICES DE CALIDAD DE VIDA / IMPACTO DE LA ENFERMEDAD (PRO)

**1.1.** Indique su grado de acuerdo con las siguientes recomendaciones **GENERALES** en relación valoración de **índices de calidad de vida** tanto en pacientes con **EspAax** como en pacientes con **APs** (siendo 1 nada de acuerdo y 9 totalmente de acuerdo):

|                                                                                                                            | 1<br>Nada de<br>acuerdo  | 2                        | 3                        | 4                        | 5                        | 6                        | 7                        | 8                        | 9<br>Totalmente<br>de<br>acuerdo |
|----------------------------------------------------------------------------------------------------------------------------|--------------------------|--------------------------|--------------------------|--------------------------|--------------------------|--------------------------|--------------------------|--------------------------|----------------------------------|
| <b>Recomendaciones <u>GENERALES</u> en relación al seguimiento de los pacientes con EspAax y APs:</b>                      |                          |                          |                          |                          |                          |                          |                          |                          |                                  |
| a. Es <b>ALTAMENTE ACONSEJABLE</b> evaluar al menos un índice de calidad de vida, <b>al menos una vez al año</b> .         | <input type="checkbox"/>         |
| b. Es <b>ACONSEJABLE</b> evaluar al menos un índice de calidad de vida <b>en cada visita</b> .                             | <input type="checkbox"/>         |
| c. Sería <b>NECESARIO</b> disponer de enfermería que ayude al paciente a cumplimentar los cuestionarios antes de la visita | <input type="checkbox"/>         |

**1.2.** Indique su grado de acuerdo con las siguientes recomendaciones en relación a la valoración de **índices de calidad de vida** en paciente con **EspAax** (siendo 1 nada de acuerdo y 9 totalmente de acuerdo):

|                                                                                                                             | 1<br>Nada de<br>acuerdo  | 2                        | 3                        | 4                        | 5                        | 6                        | 7                        | 8                        | 9<br>Totalmente<br>de<br>acuerdo |
|-----------------------------------------------------------------------------------------------------------------------------|--------------------------|--------------------------|--------------------------|--------------------------|--------------------------|--------------------------|--------------------------|--------------------------|----------------------------------|
| Es <b>ALTAMENTE ACONSEJABLE</b> realizar la siguiente valoración durante el seguimiento del paciente con <b>EspAax</b> :    |                          |                          |                          |                          |                          |                          |                          |                          |                                  |
| d. Patient Global Assessment (PtGA) en cada visita                                                                          | <input type="checkbox"/>         |
| Es <b>ACONSEJABLE</b> , realizar las siguientes valoraciones durante el seguimiento del paciente con <b>EspAax</b> :        |                          |                          |                          |                          |                          |                          |                          |                          |                                  |
| e. Índice de Salud ASASHI                                                                                                   | <input type="checkbox"/>         |
| <b>SE PODRÍA PRESCINDIR DE</b> realizar las siguientes valoraciones durante el seguimiento del paciente con <b>EspAax</b> : |                          |                          |                          |                          |                          |                          |                          |                          |                                  |
| f. Índice de calidad de vida ASQoL                                                                                          | <input type="checkbox"/>         |

**1.3.** Indique su grado de acuerdo con las siguientes recomendaciones en relación a la valoración de **índices de calidad de vida** en paciente con **APs** (siendo 1 nada de acuerdo y 9 totalmente de acuerdo):

|                                                                                                                           | 1<br>Nada de<br>acuerdo  | 2                        | 3                        | 4                        | 5                        | 6                        | 7                        | 8                        | 9<br>Totalmente<br>de<br>acuerdo |
|---------------------------------------------------------------------------------------------------------------------------|--------------------------|--------------------------|--------------------------|--------------------------|--------------------------|--------------------------|--------------------------|--------------------------|----------------------------------|
| Es <b>ALTAMENTE ACONSEJABLE</b> realizar las siguientes valoraciones durante el seguimiento del paciente con <b>APs</b> : |                          |                          |                          |                          |                          |                          |                          |                          |                                  |
| a. Patient Global Assessment (PtGA) en cada visita.                                                                       | <input type="checkbox"/>         |
| b. PsAID-12 (Psoriatic Arthritis Impact of Disease)                                                                       | <input type="checkbox"/>         |
| c. PsAQOL (Psoriatic Arthritis Quality of Life)                                                                           | <input type="checkbox"/>         |
| Es <b>ACONSEJABLE</b> realizar las siguientes valoraciones durante el seguimiento del paciente con <b>APs</b> :           |                          |                          |                          |                          |                          |                          |                          |                          |                                  |

|                                                                                                                          |                          |                          |                          |                          |                          |                          |                          |                          |                          |
|--------------------------------------------------------------------------------------------------------------------------|--------------------------|--------------------------|--------------------------|--------------------------|--------------------------|--------------------------|--------------------------|--------------------------|--------------------------|
| d. PsAID-12 (Psoriatic Arthritis Quality of Life) al menos una vez al año.                                               | <input type="checkbox"/> |
| <b>SE PODRÍA PRESCINDIR DE</b> realizar las siguientes valoraciones durante el seguimiento del paciente con <b>APs</b> : |                          |                          |                          |                          |                          |                          |                          |                          |                          |
| e. Cuestionario SF-12/36                                                                                                 | <input type="checkbox"/> |
| f. PsAQOL (Psoriatic Arthritis Quality of Life)                                                                          | <input type="checkbox"/> |
| g. EQ-5D (European Quality of Life)                                                                                      | <input type="checkbox"/> |
| h. VITACORA-19                                                                                                           | <input type="checkbox"/> |

## 2. EXPLORACIÓN FÍSICA Y METROLOGÍA

**2.1.** Indique su grado de acuerdo con las siguientes recomendaciones **GENERALES** en relación **exploración física y metrología** tanto en pacientes con **EspAax** como en pacientes con **APs** (*siendo 1 nada de acuerdo y 9 totalmente de acuerdo*):

|                                                                                                       | 1<br>Nada de<br>acuerdo  | 2                        | 3                        | 4                        | 5                        | 6                        | 7                        | 8                        | 9<br>Totalmente<br>de<br>acuerdo |
|-------------------------------------------------------------------------------------------------------|--------------------------|--------------------------|--------------------------|--------------------------|--------------------------|--------------------------|--------------------------|--------------------------|----------------------------------|
| <b>Recomendaciones <u>GENERALES</u> en relación al seguimiento de los pacientes con EspAax y APs:</b> |                          |                          |                          |                          |                          |                          |                          |                          |                                  |
| g. La <b>metrología</b> debería realizarse <b>mínimo una vez al año</b>                               | <input type="checkbox"/>         |
| h. La <b>exploración física</b> debería realizarse en <b>cada visita</b>                              | <input type="checkbox"/>         |
| i. Importante tener presente la posibilidad de afectación periférica en pacientes con EspAax.         | <input type="checkbox"/>         |

**2.2.** Indique su grado de acuerdo con las siguientes recomendaciones en relación a la **exploración física y metrología** del paciente con **EspAax** (*siendo 1 nada de acuerdo y 9 totalmente de acuerdo*):

|                                                                                                                               | 1<br>Nada de<br>acuerdo                                                                                                  | 2                        | 3                        | 4                        | 5                        | 6                        | 7                        | 8                        | 9<br>Totalmente<br>de<br>acuerdo |
|-------------------------------------------------------------------------------------------------------------------------------|--------------------------------------------------------------------------------------------------------------------------|--------------------------|--------------------------|--------------------------|--------------------------|--------------------------|--------------------------|--------------------------|----------------------------------|
| <b>Es <u>ALTAMENTE ACONSEJABLE</u> realizar las siguientes valoraciones en el <b>seguimiento</b> del paciente con EspAax:</b> |                                                                                                                          |                          |                          |                          |                          |                          |                          |                          |                                  |
| <b>METROLOGÍA</b>                                                                                                             | a. Exploración de caderas, en cada visita                                                                                | <input type="checkbox"/>         |
|                                                                                                                               | b. Valorar la movilidad cervical, realizando <b>al menos un trago-pared</b> o un <b>occipucio-pared, una vez al año.</b> | <input type="checkbox"/>         |
|                                                                                                                               | c. Rotación cervical, una vez al año                                                                                     | <input type="checkbox"/>         |

|                                                                                                                    |                                                                                                                                                                                                                                       |                          |                          |                          |                          |                          |                          |                          |                          |
|--------------------------------------------------------------------------------------------------------------------|---------------------------------------------------------------------------------------------------------------------------------------------------------------------------------------------------------------------------------------|--------------------------|--------------------------|--------------------------|--------------------------|--------------------------|--------------------------|--------------------------|--------------------------|
|                                                                                                                    | d. <b>Test de Schöber modificado</b> , una vez al año                                                                                                                                                                                 | <input type="checkbox"/> |
|                                                                                                                    | e. Expansión torácica, una vez al año                                                                                                                                                                                                 | <input type="checkbox"/> |
|                                                                                                                    | f. Distancia dedo-suelo, una vez al año                                                                                                                                                                                               | <input type="checkbox"/> |
|                                                                                                                    | g. Distancia intermaleolar                                                                                                                                                                                                            | <input type="checkbox"/> |
| <b>EXPLORACIÓN FÍSICA</b>                                                                                          | h. Preguntar sobre antecedentes de ojo rojo en cada visita                                                                                                                                                                            | <input type="checkbox"/> |
|                                                                                                                    | i. Tener en cuenta la piel a través de la anamnesis en cada visita                                                                                                                                                                    | <input type="checkbox"/> |
|                                                                                                                    | j. Realizar un recuento de las <b>entesitis sintomáticas</b> en <b>cada visita</b> .                                                                                                                                                  | <input type="checkbox"/> |
|                                                                                                                    | k. Realizar un recuento de las <b>articulaciones tumefactas / dolorosas</b> que sean <b>sintomáticas</b> en <b>cada visita</b>                                                                                                        | <input type="checkbox"/> |
|                                                                                                                    | l. Realizar el <b>recuento específico de dactilitis, en cada visita</b> , y registrarla por separado del recuento articular.                                                                                                          | <input type="checkbox"/> |
|                                                                                                                    | m. En algunas regiones se consensó que es <u>ALTAMENTE ACONSEJABLE</u> <b>preguntar por la clínica intestinal. Si no hay sintomatología, con una frecuencia anual.</b> Por favor, indique su grado de acuerdo con esta recomendación. | <input type="checkbox"/> |
| <b>Es <u>ACONSEJABLE</u> realizar las siguientes exploraciones durante el seguimiento del paciente con EspAax:</b> |                                                                                                                                                                                                                                       |                          |                          |                          |                          |                          |                          |                          |                          |
|                                                                                                                    | n. Flexión lateral de tronco, una vez al año                                                                                                                                                                                          | <input type="checkbox"/> |
|                                                                                                                    | o. <u>En caso de clínica</u> , una exploración de <b>todas las entesitis</b> , al menos, una vez al año.                                                                                                                              | <input type="checkbox"/> |
|                                                                                                                    | p. En caso de clínica, explorar <b>únicamente las entesitis sintomáticas</b> .                                                                                                                                                        | <input type="checkbox"/> |
|                                                                                                                    | q. En caso de <b>afectación periférica</b> , realizar un <b>recuento de</b>                                                                                                                                                           | <input type="checkbox"/> |

|                                                                                                                        |                                                                             |                          |                          |                          |                          |                          |                          |                          |                          |
|------------------------------------------------------------------------------------------------------------------------|-----------------------------------------------------------------------------|--------------------------|--------------------------|--------------------------|--------------------------|--------------------------|--------------------------|--------------------------|--------------------------|
|                                                                                                                        | <b>articulaciones tumefactas/dolorosas (66/68) al menos una vez al año.</b> |                          |                          |                          |                          |                          |                          |                          |                          |
| <b>SE PODRÍA PRESCINDIR DE</b> realizar las siguientes valoraciones en el seguimiento del paciente con <b>EspAax</b> : |                                                                             |                          |                          |                          |                          |                          |                          |                          |                          |
| <b>METROLOGÍA</b>                                                                                                      | r. Distancia intermaleolar                                                  | <input type="checkbox"/> |
|                                                                                                                        | s. Test de Schöber                                                          | <input type="checkbox"/> |
|                                                                                                                        | t.                                                                          |                          |                          |                          |                          |                          |                          |                          |                          |
| <b>EXPL. FÍSICA</b>                                                                                                    | u. Recuento articular tumefactas/dolorosas (28/28)                          | <input type="checkbox"/> |
|                                                                                                                        | v.                                                                          |                          |                          |                          |                          |                          |                          |                          |                          |

**2.3.** Indique su grado de acuerdo con las siguientes recomendaciones en relación a la **exploración física y metrología** del paciente con **APs** (siendo 1 nada de acuerdo y 9 totalmente de acuerdo):

|                                                                                                                      |                                                                                                    | 1                        | 2                        | 3                        | 4                        | 5                        | 6                        | 7                        | 8                        | 9                        |
|----------------------------------------------------------------------------------------------------------------------|----------------------------------------------------------------------------------------------------|--------------------------|--------------------------|--------------------------|--------------------------|--------------------------|--------------------------|--------------------------|--------------------------|--------------------------|
|                                                                                                                      |                                                                                                    | Nada de acuerdo          |                          |                          |                          |                          |                          |                          |                          | Totalmente de acuerdo    |
| <b>Es ALTAMENTE ACONSEJABLE</b> realizar las siguientes valoraciones en el seguimiento del paciente con <b>APs</b> : |                                                                                                    |                          |                          |                          |                          |                          |                          |                          |                          |                          |
| <b>METROLOGÍA</b>                                                                                                    | a. Exploración de caderas, en cada visita                                                          | <input type="checkbox"/> |
|                                                                                                                      | b. Exploración de caderas, al menos una vez al año                                                 | <input type="checkbox"/> |
| <b>EXPLORACIÓN FÍSICA</b>                                                                                            | c. Preguntar sobre antecedentes de ojo rojo, en cada visita                                        | <input type="checkbox"/> |
|                                                                                                                      | d. Valoración cutánea y ungueal, en cada visita                                                    | <input type="checkbox"/> |
|                                                                                                                      | e. Realizar un recuento de las <b>entesitis sintomáticas</b> en <b>cada visita</b> .               | <input type="checkbox"/> |
|                                                                                                                      | f. Realizar un recuento de las <b>articulaciones tumefactas / dolorosas (66/68)</b> en cada visita | <input type="checkbox"/> |

|                                                                                                                                                                      |                                                                                                                              |                          |                          |                          |                          |                          |                          |                          |                          |                          |
|----------------------------------------------------------------------------------------------------------------------------------------------------------------------|------------------------------------------------------------------------------------------------------------------------------|--------------------------|--------------------------|--------------------------|--------------------------|--------------------------|--------------------------|--------------------------|--------------------------|--------------------------|
|                                                                                                                                                                      | g. Realizar el <b>recuento específico de dactilitis, en cada visita</b> , y registrarla por separado del recuento articular. | <input type="checkbox"/> |
| En el caso un <b>paciente con APs</b> que presente <b>CLÍNICA AXIAL</b> , es <b>ACONSEJABLE</b> realizar las siguientes valoraciones durante su <b>seguimiento</b> : |                                                                                                                              |                          |                          |                          |                          |                          |                          |                          |                          |                          |
| <b>METROLOGÍA</b>                                                                                                                                                    | h. Valorar la movilidad cervical, realizando <b>al menos un trago-pared</b> o un <b>occipucio-pared</b> , una vez al año.    | <input type="checkbox"/> |
|                                                                                                                                                                      | i. Rotación cervical, una vez al año                                                                                         | <input type="checkbox"/> |
|                                                                                                                                                                      | j. <b>Test de Schöber modificado</b> , una vez al año                                                                        | <input type="checkbox"/> |
|                                                                                                                                                                      | k. Expansión torácica, una vez al año                                                                                        | <input type="checkbox"/> |
|                                                                                                                                                                      | l. Distancia dedo-suelo, una vez al año                                                                                      | <input type="checkbox"/> |
|                                                                                                                                                                      | m. Flexión lateral de tronco, una vez al año                                                                                 | <input type="checkbox"/> |
| Es <b>ACONSEJABLE</b> , realizar las siguientes exploraciones en la visita de seguimiento del paciente con <b>APs</b> :                                              |                                                                                                                              |                          |                          |                          |                          |                          |                          |                          |                          |                          |
|                                                                                                                                                                      | n. Realzar una exploración de <b>todas las entesitis</b> , al menos, una vez al año.                                         | <input type="checkbox"/> |
| <b>SE PODRÍA PRESCINDIR DE</b> realizar las siguientes valoraciones en la visita de seguimiento del paciente con <b>APs</b> :                                        |                                                                                                                              |                          |                          |                          |                          |                          |                          |                          |                          |                          |
| <b>METROLOGÍA</b>                                                                                                                                                    | o. Distancia intermaleolar                                                                                                   | <input type="checkbox"/> |
|                                                                                                                                                                      | p. Test de Schöber                                                                                                           | <input type="checkbox"/> |
| <b>EXPL. FÍSICA</b>                                                                                                                                                  | q. Recuento articular tumefactas/dolorosas (28/28)                                                                           | <input type="checkbox"/> |
|                                                                                                                                                                      | r. Realizar una exploración únicamente de las articulaciones sintomáticas.                                                   | <input type="checkbox"/> |



### 3. EVALUACIÓN DE COMORBILIDADES Y MANIFESTACIONES EXTRAARTICULARES

**3.1.** Indique su grado de acuerdo con las siguientes recomendaciones **GENERALES** en relación **evaluación de comorbilidades y manifestaciones extraarticulares**, tanto en pacientes con **EspAax** como en pacientes con **APs** (siendo 1 nada de acuerdo y 9 totalmente de acuerdo):

|                                                                                                                                                                                                   | 1<br>Nada de<br>acuerdo  | 2                        | 3                        | 4                        | 5                        | 6                        | 7                        | 8                        | 9<br>Totalmente<br>de<br>acuerdo |
|---------------------------------------------------------------------------------------------------------------------------------------------------------------------------------------------------|--------------------------|--------------------------|--------------------------|--------------------------|--------------------------|--------------------------|--------------------------|--------------------------|----------------------------------|
| <b>Recomendaciones <u>GENERALES</u> en relación al seguimiento de los pacientes con EspAax y APs:</b>                                                                                             |                          |                          |                          |                          |                          |                          |                          |                          |                                  |
| j. Es ALTAMENTE ACONSEJABLE evaluar factores de riesgo cardiovascular, independientemente de si la valoración la hace el servicio de reumatología, enfermería o viene hecha de atención primaria. | <input type="checkbox"/>         |
| k. Es ALTAMENTE ACONSEJABLE <b>revisar la historia clínica</b> del paciente en cada visita, para valorar las comorbilidades, aunque no se le pregunten directamente al paciente en consulta.      | <input type="checkbox"/>         |
| l. Sería ALTAMENTE ACONSEJABLE <b>disponer de enfermería que realice la valoración de los factores de riesgo cardiovascular</b> (Peso, talla, IMC, tensión arterial)                              | <input type="checkbox"/>         |

**3.2.** Indique su grado de acuerdo con las siguientes recomendaciones en relación a la **evaluación de comorbilidades y manifestaciones extraarticulares** en paciente con **EspAax** (siendo 1 nada de acuerdo y 9 totalmente de acuerdo):

|                                                                                                                                                                  | 1<br>Nada de<br>acuerdo  | 2                        | 3                        | 4                        | 5                        | 6                        | 7                        | 8                        | 9<br>Totalmente<br>de<br>acuerdo |
|------------------------------------------------------------------------------------------------------------------------------------------------------------------|--------------------------|--------------------------|--------------------------|--------------------------|--------------------------|--------------------------|--------------------------|--------------------------|----------------------------------|
| Es <b>ALTAMENTE ACONSEJABLE</b> evaluar las siguientes comorbilidades y manifestaciones extraarticulares durante el seguimiento del paciente con <b>EspAax</b> : |                          |                          |                          |                          |                          |                          |                          |                          |                                  |
| <b>AL MENOS, UNA VEZ AL AÑO:</b>                                                                                                                                 |                          |                          |                          |                          |                          |                          |                          |                          |                                  |
| a. Peso/Talla/IMC                                                                                                                                                | <input type="checkbox"/>         |
| b. Tensión arterial                                                                                                                                              | <input type="checkbox"/>         |
| c. Preguntarle al paciente si tiene psoriasis al inicio y después anualmente.                                                                                    | <input type="checkbox"/>         |
| <b>EN CADA VISITA, a través de la anamnesis y/o historia clínica:</b>                                                                                            |                          |                          |                          |                          |                          |                          |                          |                          |                                  |
| d. Tabaco                                                                                                                                                        | <input type="checkbox"/>         |
| e. Enfermedad cardiovascular                                                                                                                                     | <input type="checkbox"/>         |
| f. Dislipemia                                                                                                                                                    | <input type="checkbox"/>         |
| g. Insuficiencia Renal                                                                                                                                           | <input type="checkbox"/>         |
| h. Hipertensión arterial                                                                                                                                         | <input type="checkbox"/>         |
| i. Diabetes mellitus                                                                                                                                             | <input type="checkbox"/>         |
| j. Obesidad/ Sobrepeso                                                                                                                                           | <input type="checkbox"/>         |
| k. Enfermedad intestinal inflamatoria (CU y CROHN)                                                                                                               | <input type="checkbox"/>         |
| l. Uveítis (confirmada por un oftalmólogo)                                                                                                                       | <input type="checkbox"/>         |
| m. Sedentarismo, cantidad y tipo de ejercicio                                                                                                                    | <input type="checkbox"/>         |
| n. Alcohol                                                                                                                                                       | <input type="checkbox"/>         |
| o. Síndrome metabólico                                                                                                                                           | <input type="checkbox"/>         |

|                                                                                                                                                |                          |                          |                          |                          |                          |                          |                          |                          |                          |
|------------------------------------------------------------------------------------------------------------------------------------------------|--------------------------|--------------------------|--------------------------|--------------------------|--------------------------|--------------------------|--------------------------|--------------------------|--------------------------|
| p. Úlcera gástrica                                                                                                                             | <input type="checkbox"/> |
| q. Osteoporosis, <u>en caso de presentar factores de riesgo.</u>                                                                               | <input type="checkbox"/> |
| Es <b>ACONSEJABLE</b> evaluar las siguientes comorbilidades y manifestaciones extraarticulares durante el seguimiento del paciente con EspAax: |                          |                          |                          |                          |                          |                          |                          |                          |                          |
| r. Perímetro abdominal, al menos una vez al año                                                                                                | <input type="checkbox"/> |
| s. Gota, a través de la anamnesis, en cada visita                                                                                              | <input type="checkbox"/> |
| t. Gota, a través de la anamnesis, de forma anual                                                                                              | <input type="checkbox"/> |
| u. Depresión/Ansiedad, en cada visita                                                                                                          | <input type="checkbox"/> |
| v. Hígado graso no alcohólico, a través de la analítica, en cada visita                                                                        | <input type="checkbox"/> |
| w. Hígado graso no alcohólico, a través de la analítica, de forma anual                                                                        | <input type="checkbox"/> |
| x. Valorar infecciones. Por favor, indique su grado de acuerdo con esta recomendación.                                                         | <input type="checkbox"/> |
| y. Valorar vacunación.                                                                                                                         | <input type="checkbox"/> |
| SE PODRÍA PRESCINDIR DE explorar las comorbilidades y manifestaciones extraarticulares durante el seguimiento del paciente con EspAax:         |                          |                          |                          |                          |                          |                          |                          |                          |                          |
| z. Puntos de fibromialgia                                                                                                                      | <input type="checkbox"/> |
| aa. Valorar la presencia de Gota.                                                                                                              | <input type="checkbox"/> |

**3.3.** Indique su grado de acuerdo con las siguientes recomendaciones en relación a la **evaluación de comorbilidades y manifestaciones extraarticulares** en paciente con **APs** (siendo 1 nada de acuerdo y 9 totalmente de acuerdo):

|                                                                                                                                                               | 1<br>Nada de<br>acuerdo  | 2                        | 3                        | 4                        | 5                        | 6                        | 7                        | 8                        | 9<br>Totalmente<br>de<br>acuerdo |
|---------------------------------------------------------------------------------------------------------------------------------------------------------------|--------------------------|--------------------------|--------------------------|--------------------------|--------------------------|--------------------------|--------------------------|--------------------------|----------------------------------|
| Es <b>ALTAMENTE ACONSEJABLE</b> evaluar las siguientes comorbilidades y manifestaciones extraarticulares durante el seguimiento del paciente con <b>APs</b> : |                          |                          |                          |                          |                          |                          |                          |                          |                                  |
| <b>AL MENOS, UNA VEZ AL AÑO:</b>                                                                                                                              |                          |                          |                          |                          |                          |                          |                          |                          |                                  |
| a. Peso/Talla/IMC                                                                                                                                             | <input type="checkbox"/>         |
| b. Tensión arterial                                                                                                                                           | <input type="checkbox"/>         |
| c. Perímetro abdominal                                                                                                                                        | <input type="checkbox"/>         |
| d. Hígado graso no alcohólico                                                                                                                                 | <input type="checkbox"/>         |
| <b>EN CADA VISITA, a través de la anamnesis y/o historia clínica:</b>                                                                                         |                          |                          |                          |                          |                          |                          |                          |                          |                                  |
| e. Tabaco                                                                                                                                                     | <input type="checkbox"/>         |
| f. Enfermedad cardiovascular                                                                                                                                  | <input type="checkbox"/>         |
| g. Dislipemia                                                                                                                                                 | <input type="checkbox"/>         |
| h. Insuficiencia Renal                                                                                                                                        | <input type="checkbox"/>         |
| i. Hipertensión arterial                                                                                                                                      | <input type="checkbox"/>         |
| j. Diabetes mellitus                                                                                                                                          | <input type="checkbox"/>         |
| k. Obesidad/ Sobrepeso                                                                                                                                        | <input type="checkbox"/>         |
| l. Enfermedad intestinal inflamatoria (CU y CROHN)                                                                                                            | <input type="checkbox"/>         |
| m. Uveítis (confirmada por un oftalmólogo)                                                                                                                    | <input type="checkbox"/>         |
| n. Sedentarismo, cantidad y tipo de ejercicio                                                                                                                 | <input type="checkbox"/>         |
| o. Alcohol                                                                                                                                                    | <input type="checkbox"/>         |
| p. Síndrome metabólico                                                                                                                                        | <input type="checkbox"/>         |

|                                                                                                                                                     |                          |                          |                          |                          |                          |                          |                          |                          |                          |
|-----------------------------------------------------------------------------------------------------------------------------------------------------|--------------------------|--------------------------|--------------------------|--------------------------|--------------------------|--------------------------|--------------------------|--------------------------|--------------------------|
| q. Depresión/Ansiedad                                                                                                                               | <input type="checkbox"/> |
| r. Hígado graso no alcohólico                                                                                                                       | <input type="checkbox"/> |
| s. Úlcera gástrica                                                                                                                                  | <input type="checkbox"/> |
| t. Osteoporosis, en caso de presentar factores de riesgo                                                                                            | <input type="checkbox"/> |
| Es <b>ACONSEJABLE</b> evaluar las siguientes comorbilidades y manifestaciones extraarticulares durante el seguimiento del paciente con <b>APs</b> : |                          |                          |                          |                          |                          |                          |                          |                          |                          |
| u. Perímetro abdominal, al menos una vez al año                                                                                                     | <input type="checkbox"/> |
| v. Gota, a través de la anamnesis, <b>en cada visita</b>                                                                                            | <input type="checkbox"/> |
| w. Gota, a través de la anamnesis, <b>de forma anual.</b>                                                                                           | <input type="checkbox"/> |
| x. Depresión/Ansiedad, en cada visita                                                                                                               | <input type="checkbox"/> |
| y. Hígado graso no alcohólico, a través de la analítica, en cada visita                                                                             | <input type="checkbox"/> |
| z. Hígado graso no alcohólico, a través de la analítica, de forma anual                                                                             | <input type="checkbox"/> |
| aa. Valorar infecciones.                                                                                                                            | <input type="checkbox"/> |
| bb. Valorar vacunación.                                                                                                                             | <input type="checkbox"/> |
| SE PODRÍA PRESCINDIR DE explorar las comorbilidades y manifestaciones extraarticulares durante el seguimiento del paciente con <b>APs</b> :         |                          |                          |                          |                          |                          |                          |                          |                          |                          |
| cc. Puntos de fibromialgia                                                                                                                          | <input type="checkbox"/> |

## 4. ÍNDICES DE ACTIVIDAD Y FUNCIÓN

**4.1.** Indique su grado de acuerdo con las siguientes recomendaciones **GENERALES** en relación valoración de los **índices de actividad y función** tanto en pacientes con **EspAax** como en pacientes con **APs** (siendo 1 nada de acuerdo y 9 totalmente de acuerdo):

|                                                                                                                                                         | 1<br>Nada<br>de<br>acuerdo | 2                        | 3                        | 4                        | 5                        | 6                        | 7                        | 8                        | 9<br>Totalmente<br>de<br>acuerdo |
|---------------------------------------------------------------------------------------------------------------------------------------------------------|----------------------------|--------------------------|--------------------------|--------------------------|--------------------------|--------------------------|--------------------------|--------------------------|----------------------------------|
| <b>Recomendaciones GENERALES:</b>                                                                                                                       |                            |                          |                          |                          |                          |                          |                          |                          |                                  |
| a. Sería ALTAMENTE ACONSEJABLE impulsar el papel de enfermería especializada en reumatología para aumentar el uso de los índices de actividad y función | <input type="checkbox"/>   | <input type="checkbox"/> | <input type="checkbox"/> | <input type="checkbox"/> | <input type="checkbox"/> | <input type="checkbox"/> | <input type="checkbox"/> | <input type="checkbox"/> | <input type="checkbox"/>         |
| b. Los índices deberían hacerse antes de entrar en consulta y ser explicados por enfermería.                                                            | <input type="checkbox"/>   | <input type="checkbox"/> | <input type="checkbox"/> | <input type="checkbox"/> | <input type="checkbox"/> | <input type="checkbox"/> | <input type="checkbox"/> | <input type="checkbox"/> | <input type="checkbox"/>         |

**4.2.** Indique su grado de acuerdo con las siguientes recomendaciones en relación a la valoración de los **índices de actividad y función** del paciente con **EspAax** (siendo 1 nada de acuerdo y 9 totalmente de acuerdo):

|                                                                                                                      | 1<br>Nada<br>de<br>acuerdo | 2                        | 3                        | 4                        | 5                        | 6                        | 7                        | 8                        | 9<br>Totalmente<br>de<br>acuerdo |
|----------------------------------------------------------------------------------------------------------------------|----------------------------|--------------------------|--------------------------|--------------------------|--------------------------|--------------------------|--------------------------|--------------------------|----------------------------------|
| <b>Es ALTAMENTE ACONSEJABLE realizar las siguientes valoraciones durante el seguimiento del paciente con EspAax:</b> |                            |                          |                          |                          |                          |                          |                          |                          |                                  |
| a. EVA dolor (0-1), en cada visita                                                                                   | <input type="checkbox"/>   | <input type="checkbox"/> | <input type="checkbox"/> | <input type="checkbox"/> | <input type="checkbox"/> | <input type="checkbox"/> | <input type="checkbox"/> | <input type="checkbox"/> | <input type="checkbox"/>         |
| b. EVA global paciente, en cada visita                                                                               | <input type="checkbox"/>   | <input type="checkbox"/> | <input type="checkbox"/> | <input type="checkbox"/> | <input type="checkbox"/> | <input type="checkbox"/> | <input type="checkbox"/> | <input type="checkbox"/> | <input type="checkbox"/>         |
| c. EVA global medico (0-1), en cada visita                                                                           | <input type="checkbox"/>   | <input type="checkbox"/> | <input type="checkbox"/> | <input type="checkbox"/> | <input type="checkbox"/> | <input type="checkbox"/> | <input type="checkbox"/> | <input type="checkbox"/> | <input type="checkbox"/>         |

|                                                                                                                             |                          |                          |                          |                          |                          |                          |                          |                          |                          |
|-----------------------------------------------------------------------------------------------------------------------------|--------------------------|--------------------------|--------------------------|--------------------------|--------------------------|--------------------------|--------------------------|--------------------------|--------------------------|
| d. ASDAS y/o BASDAI: Es ALTAMENTE ACONSEJABLE <b>realizar al menos uno de los dos</b> , en cada visita.                     | <input type="checkbox"/> |
| e. ASDAS, en cada visita                                                                                                    | <input type="checkbox"/> |
| f. BASFI, <b>mínimo una vez al año</b>                                                                                      | <input type="checkbox"/> |
| g. BASFI debería realizarse <b>en cada visita.</b>                                                                          | <input type="checkbox"/> |
| h. BASFI <b>en cada visita, sólo en formas precoces.</b>                                                                    | <input type="checkbox"/> |
| i. En <b>caso de afectación periférica, DAPSA en cada visita.</b>                                                           | <input type="checkbox"/> |
| Es <b>ACONSEJABLE</b> , realizar las siguientes valoraciones durante el seguimiento del paciente con <b>EspAax</b> :        |                          |                          |                          |                          |                          |                          |                          |                          |                          |
| j. Índice de actividad HAQ                                                                                                  | <input type="checkbox"/> |
| <b>SE PODRÍA PRESCINDIR DE</b> realizar las siguientes valoraciones durante el seguimiento del paciente con <b>EspAax</b> : |                          |                          |                          |                          |                          |                          |                          |                          |                          |
| k. Índice de actividad HAQ                                                                                                  | <input type="checkbox"/> |
| l. DAS28, aunque el paciente presente afectación periférica                                                                 | <input type="checkbox"/> |
| m. <b>BASMI</b> , a pesar de presentar afectación periférica                                                                | <input type="checkbox"/> |
| n. <b>BSA</b> , a pesar de presentar afectación periférica                                                                  | <input type="checkbox"/> |
| o. <b>MDA</b> , a pesar de presentar afectación periférica                                                                  | <input type="checkbox"/> |
| p. <b>PASI</b> , a pesar de presentar afectación periférica                                                                 | <input type="checkbox"/> |
| q. <b>DAPSA</b> , aunque presente afectación periférica                                                                     | <input type="checkbox"/> |

**4.3.** Indique su grado de acuerdo con las siguientes recomendaciones en relación valoración de los **índices de actividad y función** del paciente con **APs** (siendo 1 *nada de acuerdo* y 9 *totalmente de acuerdo*):

|                                                                                                                                                                                      | 1<br>Nada<br>de<br>acuerdo | 2                        | 3                        | 4                        | 5                        | 6                        | 7                        | 8                        | 9<br>Totalmente<br>de<br>acuerdo |
|--------------------------------------------------------------------------------------------------------------------------------------------------------------------------------------|----------------------------|--------------------------|--------------------------|--------------------------|--------------------------|--------------------------|--------------------------|--------------------------|----------------------------------|
| Es <b>ALTAMENTE ACONSEJABLE</b> realizar las siguientes valoraciones durante el seguimiento del paciente con <b>APs</b> :                                                            |                            |                          |                          |                          |                          |                          |                          |                          |                                  |
| a. EVA dolor (0-1), en cada visita                                                                                                                                                   | <input type="checkbox"/>   | <input type="checkbox"/> | <input type="checkbox"/> | <input type="checkbox"/> | <input type="checkbox"/> | <input type="checkbox"/> | <input type="checkbox"/> | <input type="checkbox"/> | <input type="checkbox"/>         |
| b. EVA global paciente, en cada visita                                                                                                                                               | <input type="checkbox"/>   | <input type="checkbox"/> | <input type="checkbox"/> | <input type="checkbox"/> | <input type="checkbox"/> | <input type="checkbox"/> | <input type="checkbox"/> | <input type="checkbox"/> | <input type="checkbox"/>         |
| c. EVA global medico (0-1), en cada visita                                                                                                                                           | <input type="checkbox"/>   | <input type="checkbox"/> | <input type="checkbox"/> | <input type="checkbox"/> | <input type="checkbox"/> | <input type="checkbox"/> | <input type="checkbox"/> | <input type="checkbox"/> | <input type="checkbox"/>         |
| d. DAPSA, en cada visita                                                                                                                                                             | <input type="checkbox"/>   | <input type="checkbox"/> | <input type="checkbox"/> | <input type="checkbox"/> | <input type="checkbox"/> | <input type="checkbox"/> | <input type="checkbox"/> | <input type="checkbox"/> | <input type="checkbox"/>         |
| En cuanto a la <b>valoración cutánea</b> del paciente con <b>APs</b> :                                                                                                               |                            |                          |                          |                          |                          |                          |                          |                          |                                  |
| e. Es <b>ALTAMENTE ACONSEJABLE</b> realizar una valoración cutánea en cada visita                                                                                                    | <input type="checkbox"/>   | <input type="checkbox"/> | <input type="checkbox"/> | <input type="checkbox"/> | <input type="checkbox"/> | <input type="checkbox"/> | <input type="checkbox"/> | <input type="checkbox"/> | <input type="checkbox"/>         |
| f. Es <b>ALTAMENTE ACONSEJABLE</b> realizar una valoración cutánea <b>conjuntamente con el dermatólogo, en casos de afectación cutánea moderada o grave.</b>                         | <input type="checkbox"/>   | <input type="checkbox"/> | <input type="checkbox"/> | <input type="checkbox"/> | <input type="checkbox"/> | <input type="checkbox"/> | <input type="checkbox"/> | <input type="checkbox"/> | <input type="checkbox"/>         |
| g. Si el dermatólogo ya evalúa la afectación cutánea, realizar un BSA es <b>ACONSEJABLE</b> . Si no lo evalúa dermatología, la realización del BSA es <b>ALTAMENTE ACONSEJABLE</b> . | <input type="checkbox"/>   | <input type="checkbox"/> | <input type="checkbox"/> | <input type="checkbox"/> | <input type="checkbox"/> | <input type="checkbox"/> | <input type="checkbox"/> | <input type="checkbox"/> | <input type="checkbox"/>         |
| h. <b>SE PODRÍA PRESCINDIR</b> DE realizar un PASI si ya se realiza el BSA.                                                                                                          | <input type="checkbox"/>   | <input type="checkbox"/> | <input type="checkbox"/> | <input type="checkbox"/> | <input type="checkbox"/> | <input type="checkbox"/> | <input type="checkbox"/> | <input type="checkbox"/> | <input type="checkbox"/>         |
| i. La valoración del PASI tendría que venir hecha de dermatología, <b>en casos de</b>                                                                                                | <input type="checkbox"/>   | <input type="checkbox"/> | <input type="checkbox"/> | <input type="checkbox"/> | <input type="checkbox"/> | <input type="checkbox"/> | <input type="checkbox"/> | <input type="checkbox"/> | <input type="checkbox"/>         |



|                                                                                                                                          |                          |                          |                          |                          |                          |                          |                          |                          |                          |
|------------------------------------------------------------------------------------------------------------------------------------------|--------------------------|--------------------------|--------------------------|--------------------------|--------------------------|--------------------------|--------------------------|--------------------------|--------------------------|
| <b>afectación cutánea moderada o grave.</b>                                                                                              |                          |                          |                          |                          |                          |                          |                          |                          |                          |
| j. Si BSA no está disponible, y no existe valoración cutánea por parte de dermatología, la valoración del PASI es ALTAMENTE ACONSEJABLE. | <input type="checkbox"/> |
| Es <b>ACONSEJABLE</b> realizar las siguientes valoraciones durante el seguimiento del paciente con <b>APs</b> :                          |                          |                          |                          |                          |                          |                          |                          |                          |                          |
| k. Índice de actividad HAQ al menos una vez al año                                                                                       | <input type="checkbox"/> |
| l. MDA, <b>una vez al año</b>                                                                                                            | <input type="checkbox"/> |
| <b>SE PODRÍA PRESCINDIR DE</b> realizar las siguientes valoraciones en la visita de seguimiento del paciente con <b>APs</b> :            |                          |                          |                          |                          |                          |                          |                          |                          |                          |
| m. DAS28                                                                                                                                 | <input type="checkbox"/> |
| n. BASMI                                                                                                                                 | <input type="checkbox"/> |
| En caso de un paciente con <b>APs y afectación axial</b> , es <b>ALTAMENTE ACONSEJABLE</b> realizar una valoración de...:                |                          |                          |                          |                          |                          |                          |                          |                          |                          |
| o. BASFI                                                                                                                                 | <input type="checkbox"/> |
| p. ASDAS y/o BASDAI: Es ALTAMENTE ACONSEJABLE <b>realizar al menos uno de los dos</b> , en cada visita.                                  | <input type="checkbox"/> |

## 5. PRUEBAS DE LABORATORIO

**5.1.** Indique su grado de acuerdo con las siguientes recomendaciones en relación a la **examinación de pruebas de laboratorio** en un paciente con **EspAax** (siendo 1 nada de acuerdo y 9 totalmente de acuerdo):

|                                                                                                                                        | 1<br>Nada de<br>acuerdo  | 2                        | 3                        | 4                        | 5                        | 6                        | 7                        | 8                        | 9<br>Totalmente<br>de<br>acuerdo |
|----------------------------------------------------------------------------------------------------------------------------------------|--------------------------|--------------------------|--------------------------|--------------------------|--------------------------|--------------------------|--------------------------|--------------------------|----------------------------------|
| Es <b>ALTAMENTE ACONSEJABLE</b> examinar las siguientes pruebas de laboratorio durante el seguimiento del paciente con <b>EspAax</b> : |                          |                          |                          |                          |                          |                          |                          |                          |                                  |
| a. Proteína C reactiva, en cada visita                                                                                                 | <input type="checkbox"/>         |
| b. Hemograma, en cada visita                                                                                                           | <input type="checkbox"/>         |
| c. Bioquímica general con perfil hepático, en cada visita                                                                              | <input type="checkbox"/>         |
| d. Perfil lipídico, cada 6 - 12 meses, en función del perfil de riesgo                                                                 | <input type="checkbox"/>         |
| e. Velocidad de sedimentación globular (VSG), en cada visita                                                                           | <input type="checkbox"/>         |
| f. Aclaramiento de la creatinina/Filtrado (MMDR-4), en cada visita                                                                     | <input type="checkbox"/>         |
| g. s. orina (sistemático de orina), mínimo una vez al año                                                                              | <input type="checkbox"/>         |
| Es <b>ACONSEJABLE</b> examinar las siguientes pruebas de laboratorio durante el seguimiento del paciente con <b>EspAax</b> :           |                          |                          |                          |                          |                          |                          |                          |                          |                                  |
| h. Ácido úrico, cada 6 - 12 meses, en función del perfil de riesgo                                                                     | <input type="checkbox"/>         |
| i. Si hay factores de riesgo, la 25-OH-vitamina D, una vez al año                                                                      | <input type="checkbox"/>         |
| j. Si hay factores de riesgo (riesgo CV, alteraciones renales...), la                                                                  | <input type="checkbox"/>         |

|                                                                                                                                                                                                                        |                          |                          |                          |                          |                          |                          |                          |                          |                          |
|------------------------------------------------------------------------------------------------------------------------------------------------------------------------------------------------------------------------|--------------------------|--------------------------|--------------------------|--------------------------|--------------------------|--------------------------|--------------------------|--------------------------|--------------------------|
| microalbuminuria/ orina, una vez al año                                                                                                                                                                                |                          |                          |                          |                          |                          |                          |                          |                          |                          |
| k. Si hay factores de riesgo (diabetes), la Hb glicosilada, una vez al año                                                                                                                                             | <input type="checkbox"/> |
| l. La valoración de Microalbuminuria, Hb glicosilada y HOMMA son ACONSEJABLES en caso de factores de riesgo, y se debería fomentar su seguimiento por AP o reumatología, en función de las condiciones de cada centro. | <input type="checkbox"/> |
| m. El sistemático de orina cada 1-2 años.                                                                                                                                                                              | <input type="checkbox"/> |
| <b>SE PODRÍA PRESCINDIR DE</b> examinar las siguientes pruebas de laboratorio durante el seguimiento del paciente con <b>EspAax</b> :                                                                                  |                          |                          |                          |                          |                          |                          |                          |                          |                          |
| n. HOMMA (índice resistencia insulina)                                                                                                                                                                                 | <input type="checkbox"/> |
| o. VSG, si ya se dispone de PCR.                                                                                                                                                                                       | <input type="checkbox"/> |

**5.2.** Indique su grado de acuerdo con las siguientes recomendaciones en relación a la **examinación de pruebas de laboratorio** en un paciente con **APs** (siendo 1 nada de acuerdo y 9 totalmente de acuerdo):

|                                                                                                                                     | 1<br>Nada de<br>acuerdo  | 2                        | 3                        | 4                        | 5                        | 6                        | 7                        | 8                        | 9<br>Totalmente<br>de<br>acuerdo |
|-------------------------------------------------------------------------------------------------------------------------------------|--------------------------|--------------------------|--------------------------|--------------------------|--------------------------|--------------------------|--------------------------|--------------------------|----------------------------------|
| <b>Es ALTAMENTE ACONSEJABLE</b> examinar las siguientes pruebas de laboratorio durante el seguimiento del paciente con <b>APs</b> : |                          |                          |                          |                          |                          |                          |                          |                          |                                  |
| a. Proteína C reactiva, en cada visita                                                                                              | <input type="checkbox"/>         |
| b. Hemograma, en cada visita                                                                                                        | <input type="checkbox"/>         |
| c. Bioquímica general con perfil hepático, en cada visita                                                                           | <input type="checkbox"/>         |

|                                                                                                                                                                                                                        |                          |                          |                          |                          |                          |                          |                          |                          |                          |
|------------------------------------------------------------------------------------------------------------------------------------------------------------------------------------------------------------------------|--------------------------|--------------------------|--------------------------|--------------------------|--------------------------|--------------------------|--------------------------|--------------------------|--------------------------|
| d. Perfil lipídico, cada 6 - 12 meses, en función del perfil de riesgo                                                                                                                                                 | <input type="checkbox"/> |
| e. Velocidad de sedimentación globular (VSG), en cada visita                                                                                                                                                           | <input type="checkbox"/> |
| f. Ácido úrico cada 6-12 meses                                                                                                                                                                                         | <input type="checkbox"/> |
| g. Aclaramiento de la creatinina/Filtrado (MMDR-4), en cada visita                                                                                                                                                     | <input type="checkbox"/> |
| h. s. orina (sistemático de orina), mínimo una vez al año                                                                                                                                                              | <input type="checkbox"/> |
| <b>Es <u>ACONSEJABLE</u> examinar las siguientes pruebas de laboratorio durante el seguimiento del paciente con APs:</b>                                                                                               |                          |                          |                          |                          |                          |                          |                          |                          |                          |
| i. Si hay factores de riesgo, la 25-OH-vitamina D, una vez al año                                                                                                                                                      | <input type="checkbox"/> |
| j. Si hay factores de riesgo (riesgo CV, alteraciones renales...), la microalbuminuria/ orina, una vez al año                                                                                                          | <input type="checkbox"/> |
| k. Si hay factores de riesgo (diabetes), la Hb glicosilada, una vez al año                                                                                                                                             | <input type="checkbox"/> |
| l. La valoración de Microalbuminuria, Hb glicosilada y HOMMA son ACONSEJABLES en caso de factores de riesgo, y se debería fomentar su seguimiento por AP o reumatología, en función de las condiciones de cada centro. | <input type="checkbox"/> |
| m. El sistemático de orina cada 1-2 años.                                                                                                                                                                              | <input type="checkbox"/> |
| <b>SE PODRÍA PRESCINDIR DE examinar las siguientes pruebas de laboratorio durante el seguimiento del paciente con APs:</b>                                                                                             |                          |                          |                          |                          |                          |                          |                          |                          |                          |
| n. HOMMA (índice resistencia insulina)                                                                                                                                                                                 | <input type="checkbox"/> |

## 6. PRUEBAS DE IMAGEN

**6.1.** Indique su grado de acuerdo con las siguientes recomendaciones en relación a la realización de **pruebas de imagen** en el paciente con **EspAax** (siendo 1 nada de acuerdo y 9 totalmente de acuerdo):

|                                                                                                                                                              | 1<br>Nada<br>de<br>acuerdo | 2                        | 3                        | 4                        | 5                        | 6                        | 7                        | 8                        | 9<br>Totalmente<br>de<br>acuerdo |
|--------------------------------------------------------------------------------------------------------------------------------------------------------------|----------------------------|--------------------------|--------------------------|--------------------------|--------------------------|--------------------------|--------------------------|--------------------------|----------------------------------|
| Es <b>ALTAMENTE ACONSEJABLE</b> realizar las siguientes pruebas de imagen en el seguimiento del paciente con <b>EspAax</b> :                                 |                            |                          |                          |                          |                          |                          |                          |                          |                                  |
| a. Radiografía de la columna lateral cervical y/o dorsal y/o lumbar, con una frecuencia en función de los factores de progresión, mínimo cada 2-3 años.      | <input type="checkbox"/>   | <input type="checkbox"/> | <input type="checkbox"/> | <input type="checkbox"/> | <input type="checkbox"/> | <input type="checkbox"/> | <input type="checkbox"/> | <input type="checkbox"/> | <input type="checkbox"/>         |
| b. Radiografía simple de pelvis, con una frecuencia en función de los factores de progresión, mínimo cada 2-3 años.                                          | <input type="checkbox"/>   | <input type="checkbox"/> | <input type="checkbox"/> | <input type="checkbox"/> | <input type="checkbox"/> | <input type="checkbox"/> | <input type="checkbox"/> | <input type="checkbox"/> | <input type="checkbox"/>         |
| c. Radiografías periféricas manos y pies <b>en caso de clínica</b>                                                                                           | <input type="checkbox"/>   | <input type="checkbox"/> | <input type="checkbox"/> | <input type="checkbox"/> | <input type="checkbox"/> | <input type="checkbox"/> | <input type="checkbox"/> | <input type="checkbox"/> | <input type="checkbox"/>         |
| Es <b>ACONSEJABLE</b> realizar las siguientes pruebas de imagen en el seguimiento del paciente con <b>EspAax</b> :                                           |                            |                          |                          |                          |                          |                          |                          |                          |                                  |
| d. RMN de articulaciones sacroilíacas, <b>en caso de dudas médicas / según la clínica, para reconfirmar un diagnóstico o ver actividad de la enfermedad.</b> | <input type="checkbox"/>   | <input type="checkbox"/> | <input type="checkbox"/> | <input type="checkbox"/> | <input type="checkbox"/> | <input type="checkbox"/> | <input type="checkbox"/> | <input type="checkbox"/> | <input type="checkbox"/>         |
| e. RMN de articulaciones sacroilíacas, <b>para valorar respuesta al tratamiento</b>                                                                          | <input type="checkbox"/>   | <input type="checkbox"/> | <input type="checkbox"/> | <input type="checkbox"/> | <input type="checkbox"/> | <input type="checkbox"/> | <input type="checkbox"/> | <input type="checkbox"/> | <input type="checkbox"/>         |
| f. RMN de columna, en caso de <b>en caso de dudas médicas sobre la actividad de</b>                                                                          | <input type="checkbox"/>   | <input type="checkbox"/> | <input type="checkbox"/> | <input type="checkbox"/> | <input type="checkbox"/> | <input type="checkbox"/> | <input type="checkbox"/> | <input type="checkbox"/> | <input type="checkbox"/>         |

|                                                                                                                             |                          |                          |                          |                          |                          |                          |                          |                          |                          |
|-----------------------------------------------------------------------------------------------------------------------------|--------------------------|--------------------------|--------------------------|--------------------------|--------------------------|--------------------------|--------------------------|--------------------------|--------------------------|
| <b>la enfermedad o diagnóstico diferencial</b>                                                                              |                          |                          |                          |                          |                          |                          |                          |                          |                          |
| g. RMN de columna, en caso de <b>para valorar respuesta al tratamiento</b>                                                  | <input type="checkbox"/> |
| h. Valoración ecográfica de la entesis periférica, en caso de clínica y/o dudas.                                            | <input type="checkbox"/> |
| i. Valoración ecográfica de articulaciones, en caso de clínica y/o dudas.                                                   | <input type="checkbox"/> |
| j. Densitometría ósea, según factores de riesgo                                                                             | <input type="checkbox"/> |
| <b>SE PODRÍA PRESCINDIR DE</b> realizar las siguientes pruebas de imagen en el seguimiento del paciente con <b>EspAax</b> : |                          |                          |                          |                          |                          |                          |                          |                          |                          |
| k. Resonancia de articulaciones periférica                                                                                  | <input type="checkbox"/> |
| l. TAC de articulaciones sacroilíacas                                                                                       | <input type="checkbox"/> |

**6.2.** Indique su grado de acuerdo con las siguientes recomendaciones en relación a la realización de **pruebas de imagen** en el paciente con **APs** (siendo 1 nada de acuerdo y 9 totalmente de acuerdo):

|                                                                                                                                | 1<br>Nada de acuerdo     | 2                        | 3                        | 4                        | 5                        | 6                        | 7                        | 8                        | 9<br>Totalmente de acuerdo |
|--------------------------------------------------------------------------------------------------------------------------------|--------------------------|--------------------------|--------------------------|--------------------------|--------------------------|--------------------------|--------------------------|--------------------------|----------------------------|
| <b>Es ALTAMENTE ACONSEJABLE</b> realizar las siguientes pruebas de imagen en el seguimiento del paciente con <b>APs</b> :      |                          |                          |                          |                          |                          |                          |                          |                          |                            |
| a. ALTAMENTE ACONSEJABLE realizar al menos una radiografía de la columna lateral cervical y/o dorsal y/o lumbar <b>basal</b> . | <input type="checkbox"/>   |
| b. Radiografías periféricas manos y pies <b>en caso de clínica</b>                                                             | <input type="checkbox"/>   |
| <b>Es ACONSEJABLE</b> , realizar las siguientes pruebas de imagen en el seguimiento del paciente con <b>EspAax</b> :           |                          |                          |                          |                          |                          |                          |                          |                          |                            |

|                                                                                                                          |                          |                          |                          |                          |                          |                          |                          |                          |                          |
|--------------------------------------------------------------------------------------------------------------------------|--------------------------|--------------------------|--------------------------|--------------------------|--------------------------|--------------------------|--------------------------|--------------------------|--------------------------|
| c. Tener al menos, una radiografía simple de pelvis                                                                      | <input type="checkbox"/> |
| d. Radiografía simple de pelvis, sólo si hay clínica                                                                     | <input type="checkbox"/> |
| e. Valoración ecográfica de la entesis periférica, en caso de clínica y/o dudas diagnósticas.                            | <input type="checkbox"/> |
| f. Valoración ecográfica de articulaciones, en caso de clínica y/o dudas.                                                | <input type="checkbox"/> |
| g. Densitometría ósea, según factores de riesgo                                                                          | <input type="checkbox"/> |
| <b>SE PODRÍA PRESCINDIR DE</b> realizar las siguientes pruebas de imagen en el seguimiento del paciente con <b>APs</b> : |                          |                          |                          |                          |                          |                          |                          |                          |                          |
| h. Resonancia de articulaciones periférica                                                                               | <input type="checkbox"/> |
| i. TAC de articulaciones sacroilíacas                                                                                    | <input type="checkbox"/> |
| <b>En caso de paciente con APs y AFECTACIÓN AXIAL...</b>                                                                 |                          |                          |                          |                          |                          |                          |                          |                          |                          |
| j. ALTAMENTE ACONSEJABLE realizar una radiografía de la columna lateral cervical y/o dorsal y/o lumbar                   | <input type="checkbox"/> |
| k. RMN de articulaciones sacroilíacas, sólo <b>en caso de clínica y dudas diagnósticas</b>                               | <input type="checkbox"/> |
| l. RMN de columna ACONSEJABLE sólo en caso de <b>en caso de clínica de columna y dudas diagnósticas</b>                  | <input type="checkbox"/> |
